# Supplementary material
Source: publisher site journal article supplement (https://static.cambridge.org/content/id/urn:cambridge.org:id:article:S0002731618000173/resource/name/Supplemental_Text_4.docx)
Supplement: Supplementary file 1 [file Supplemental_Text_4.docx]

**Supplemental References Cited**

Ballard, Hannah S.

1995 Searching for Metini: Synthesis and Analysis of Unreported Archaeological

Collections from Fort Ross State Historic Park, California*.* Senior Honors thesis, Department of Anthropology, University of California, Berkeley.

Blair, Elliot H.

2018 Glass Beads*.* In *Metini Village: An Archaeological Study of*

*Sustained Colonialism*, edited by Kent G. Lightfoot and Sara L. Gonzalez, pp. 72-77*.* The Archaeology and Ethnohistory of Fort Ross, California Vol. 3.Contributions of the University of California Archaeological Facility*.* Archaeological Research Facility, Berkeley, California.

Farris, Glenn J.

1983 Archaeological Excavations Related to the Construction of the Fort Ross Visitor's

Center, Fort Ross State Historic Park, Sonoma County, California*.* Manuscript on file,

Cultural Resource Support Unit, Department of Parks and Recreation, Sacramento, California.

Fenner, Morgan

2002 An Analysis of the Occupants of CA-SON-670/H at Fort Ross State Historic Park. Senior Honors thesis, Department of Anthropology, University of California, Berkeley.

Golovnin, Vasilii M.

1979 *Around the World on the Kamchatka 1817-1819*. Translated by Ella L. Wiswell.

Hawaiian Historical Society and University Press of Hawaii, Honolulu.

Gonzalez, Sara L.

2011 Creating Trails From Tradition: The Kashaya Pomo Interpretive Trail at Fort Ross

State Historic Park. PhD dissertation, Department of Anthropology, University of California, Berkeley.

2016 Indigenous Values and Methods in Archaeological Practice: Low-Impact Archaeology through the Kashaya Pomo Interpretive Trail Project. *American Antiquity* 81:543-549.

Istomin, Alexei A.

1992 *The Indians at the Ross Settlement According to the Censuses by Kuskov, 1820-1821*. Fort Ross Interpretive Association, Fort Ross, California.

Kidd, Kenneth E. and Martha A. Kidd

2012[1970] A Classification System for Glass Beads for the use of Field Archaeologists. *Beads* 24:39-61.

Kostromitinov, Peter

2012 Kostromitinov's Observations on the Indians of Upper California (1839)*.* In *So Far from Home: Russians in Early California*, edited by Glenn J. Farris, pp. 186-196. Heyday, Berkeley, California.

Laplace, Cyrille Pierre-Théodore

2012 Cyrille Pierre-Theodore LaPlace's Visit to Bodega Bay and Fort Ross (1839)*.* In *So Far from Home: Russians in Early California*, edited by Glenn J. Farris, pp. 235-267. Heyday, Berkeley, California.

Lightfoot, Kent G., and Sara L. Gonzalez (editors)

2018 *Metini Village: An Archaeological Study of Sustained Colonialism.* The Archaeology and Ethnohistory of Fort Ross, California Vol. 3. Contributions of the University of California Archaeological Facility. Archaeological Research Facility, Berkeley, California.

Lightfoot, Kent G., Antoinette Martinez, and Ann Schiff

1998 Daily Practice and Material Culture in Pluralistic Social Settings: An Archaeological Study of Culture Change and Persistence from Fort Ross, California. *American Antiquity* 63:199-222.

Lightfoot, Kent G., Ann M. Schiff, and Thomas A. Wake

1997 *The Native* *Alaskan Neighborhood: A Multiethnic Community at Colony Ross*. The Archaeology and Ethnohistory of Fort Ross, California Vol. 2. Contributions of the University of California Archaeological Facility No. 55. Archaeological Research Facility, Berkeley, California.

Lightfoot, Kent G., Thomas A. Wake, and Ann M. Schiff

1991 Introduction. In *The Archaeology and Ethnohistory of Fort Ross, California*, Vol. 1, edited by Kent G. Lightfoot, Thomas A. Wake and Ann M. Schiff, pp. 1-10.Contributions of the University of California Archaeological Research Facility No. 49. Archaeological Research Facility, Berkeley, California.

Martinez, Antoinette

1998 An Archaeological Study of Change and Continuity in the Material Remains, Practices and Cultural Identities of Native California Women in a Nineteenth Century Pluralistic Context*.* PhD dissertation, Department of Anthropology, University of California, Berkeley.

Newquist, Ingrid

2002 Kashaya in Post-Russian Times: Analysis of Archaeological Materials from a Multi Occupation Site at Fort Ross, California. Senior Honors thesis, Department of Anthropology, University of California, Berkeley.

Oswalt, Robert L.

1964 *Kashaya Texts*. University of California Publications in Linguistics 36. University of California, Berkeley.

Parrish, Otis, Daniel Murley, Roberta Jewett and Kent Lightfoot

2000 The Science of Archaeology and the Response from Within Native California: The Archaeology and Ethnohistory of Me?tini Village in the Fort Ross State Historic Park. *Proceedings of the Society for California Archaeology* 13:84-87.

Silliman, Stephen W.

2009 Change and Continuity, Practice and Memory: Native American Persistence in Colonial New England. *American Antiquity* 74:211-230.

2012 Between the Longue Durée and the Short Purée: Postcolonial Archaeologies of Indigenous History in Colonial North America*.* In *Decolonizing Indigenous Histories: Exploring Prehistoric/Colonial Transitions in Archaeology*, edited by Maxine Oland, Siobhan M. Hart, and Liam Frink, pp. 113-131. University of Arizona Press, Tucson.

von Wrangell, Ferdinand. P.

1974 Some Remarks on the Savages on the Northwest Coast of America. The Indians in Upper California*.* In *Ethnographic Observations on the Coast Miwok and Pomo by Contre-Admiral* *F. P. Von Wrangell and P. Kostromitinov of the Russian Colony Ross, 1839*, edited by Fred Stross and Robert Heizer, pp. 1-6. Archaeological Research Facility, University of California, Berkeley.
